# Supplementary material
Source: JCI journal article supplement (doi:10.1172/jci186335)

# Full unedited gels (Ms. 186335)

Bands used for figures:

Figure 4B

mOVA →

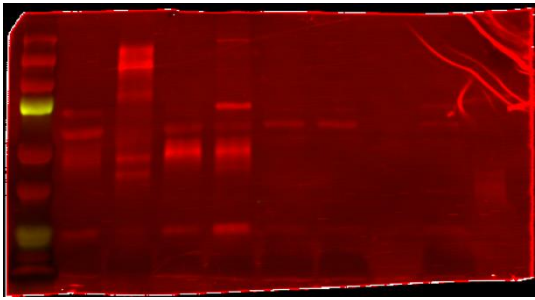

Figure 4B

Gp96 →  
(green)

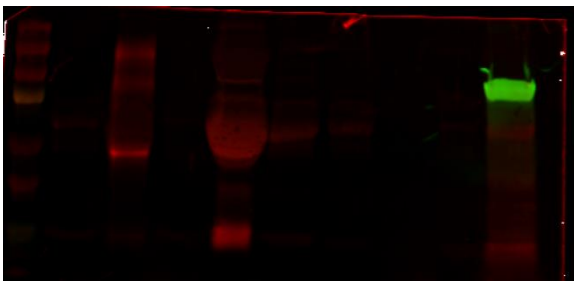

Figure 4B

CD63 →

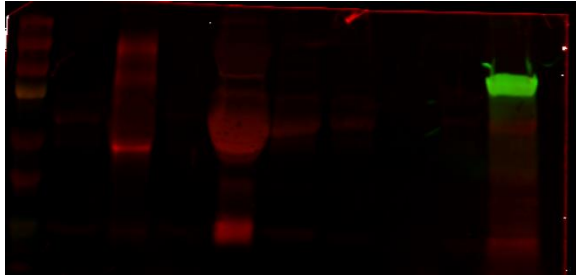

Figure 4B

CD81 →

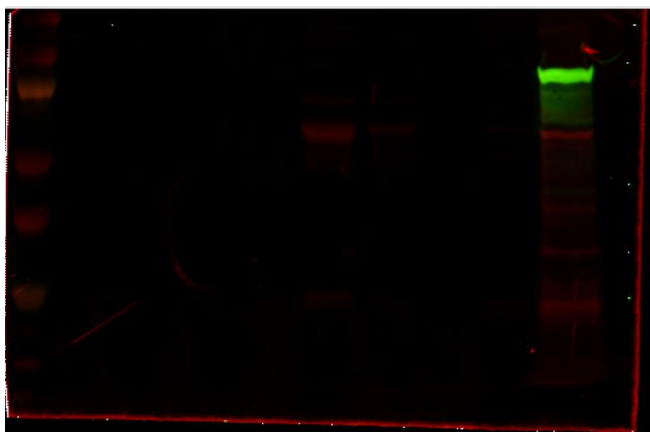

Figure 4C

mOVA →

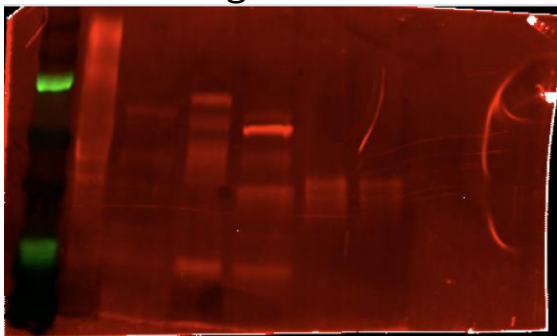

Figure 4D

CD81 →

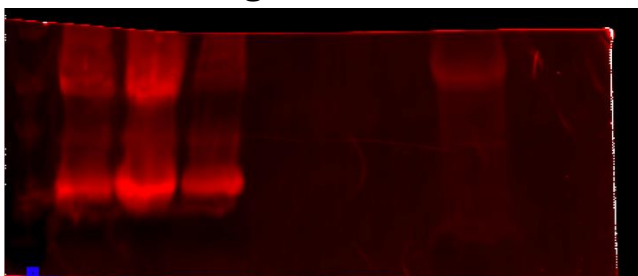

Bands used for figures:

Figure 4D

Gp96 →

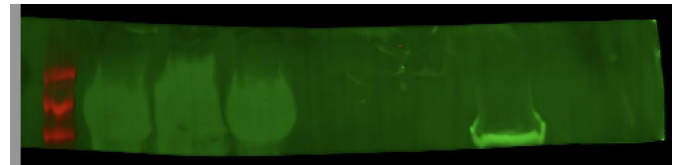

Figure 4D

mOVA →

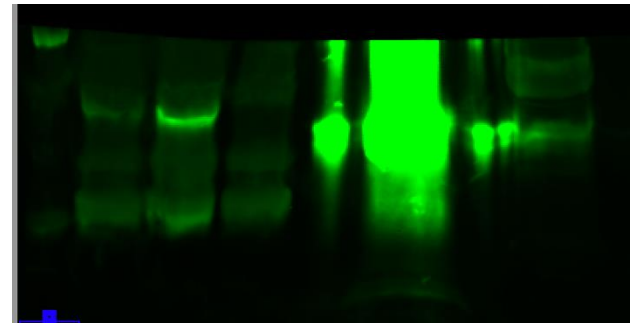

Figure 5D

mOVA →

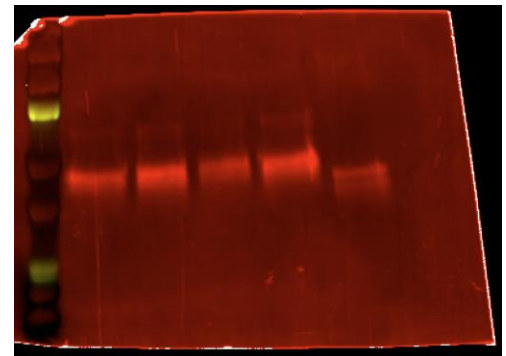

Figure 5D

Gp96 →

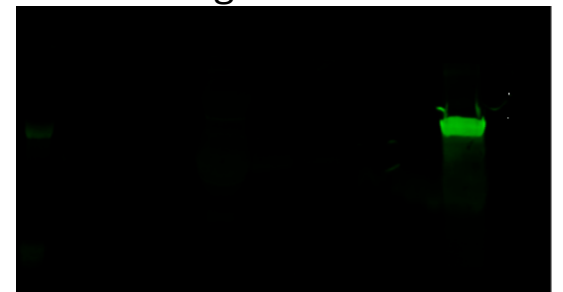

Figure 5D

mOVA →

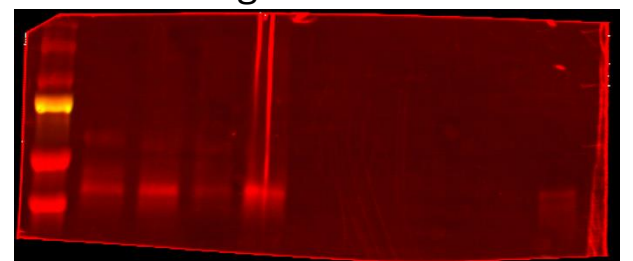

# Full unedited gels (Ms. 186335)

Bands used  
for figures:

Figure 8A

CD63 (green) →  
Calnexin (red)

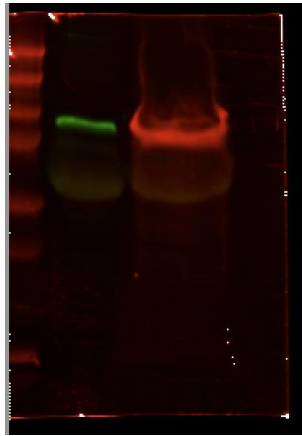

Figure 8A

Hsp90B1 (green) →

CD81 (red) →

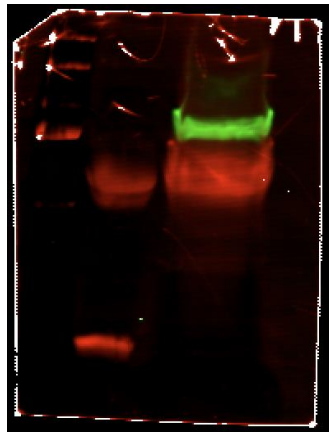

Figure 8A

GM130 →

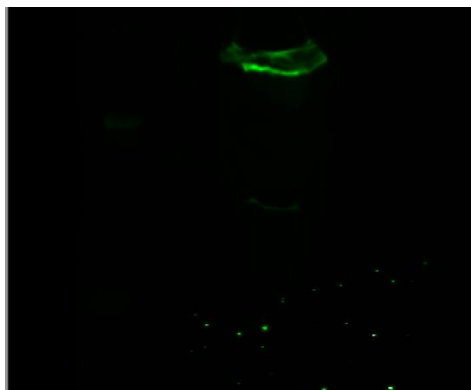

Figure 8A

Tsg101 →

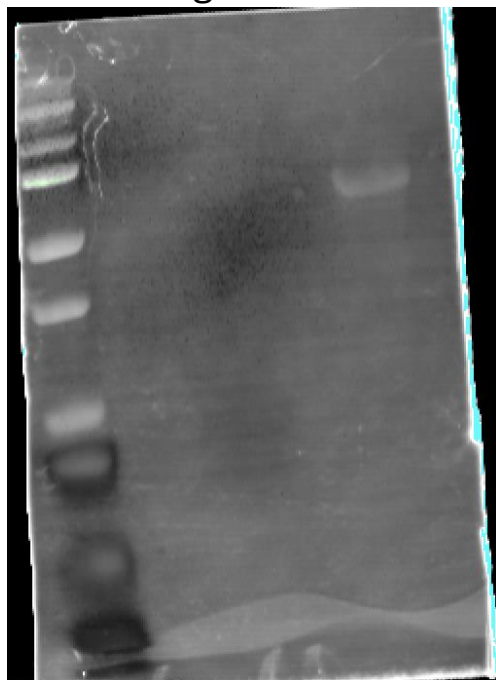

Supplement: sd2 [file 2]
